# Supplementary material for: Latitudinal variations of δ 30 Si and δ 15 N signatures along the Peruvian shelf: quantifying the effects of nutrient utilization versus denitrification over the past 600 years
Source: Copernicus journal article supplement (doi:10.5194/bg-2018-118), 2018-04-09
Supplement: Supplementary file [file bg-2018-118-AC2-supplement.pdf]

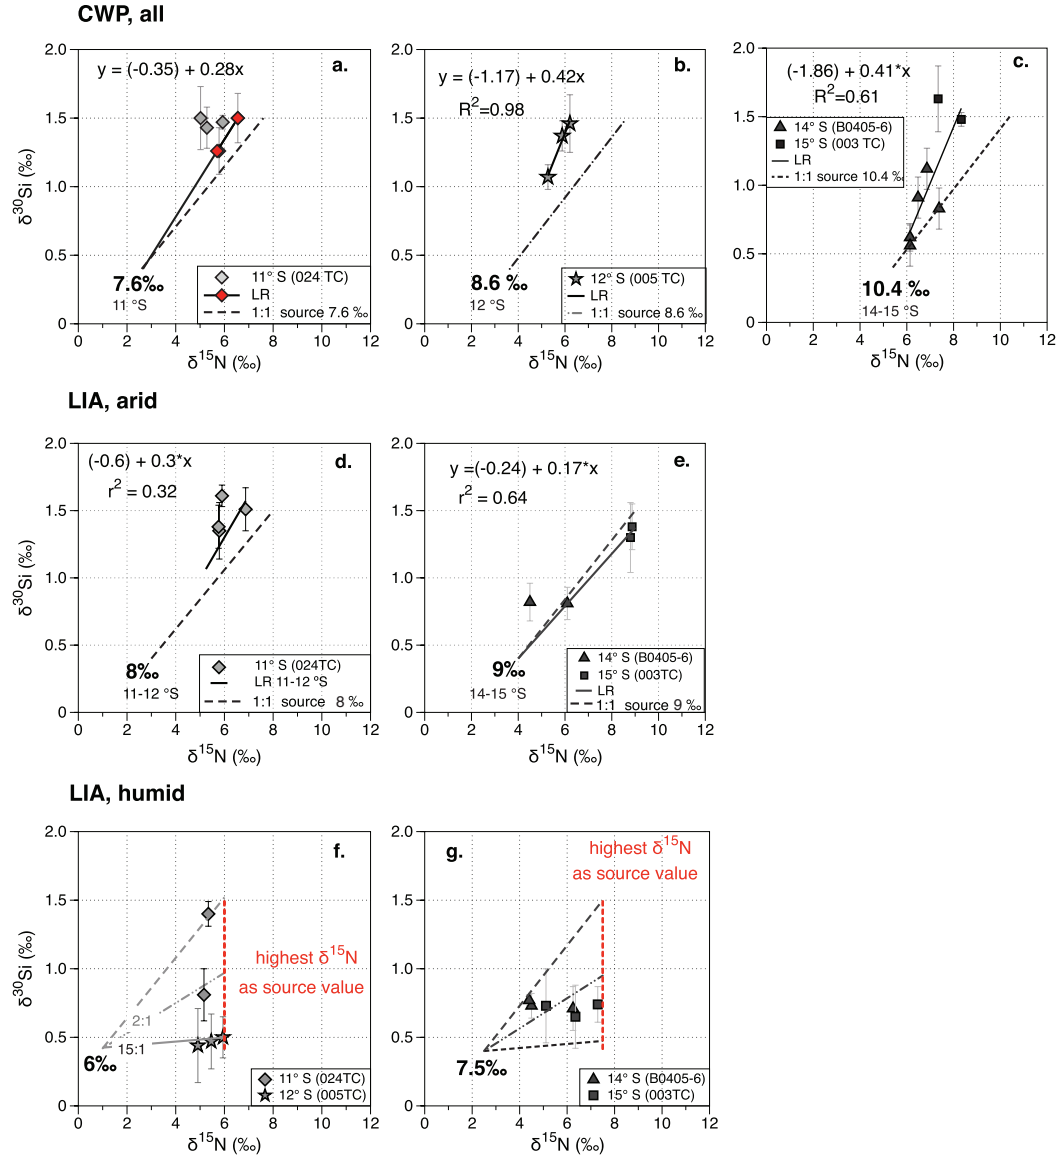

Figure S1: Calculation of  $\delta^{15}\text{NO}_3^-$  source signatures based on equations of the linear regression gained by the direct comparison of  $\delta^{15}\text{N}_{\text{Bulk}}$  versus  $\delta^{30}\text{Si}_{\text{BSi}}$  for the CWP (a-c), the LIA (arid; d, e) and LIA (humid). Black lines indicate the estimated linear regression. Dashed lines indicate the resulting 1:1 utilization line.
